# Supplementary material for: Identification of risk and protective human leukocyte antigens in COVID-19 using genotyping and structural modeling
Source: bioRxiv or medRxiv preprint supplement (doi:10.1101/2021.05.04.21256636), 2021-05-08
Supplement: Supplementary file [file media-1.pdf]

## **Identification of risk and protective human leukocyte antigens in COVID-19 using genotyping and structural modeling**

Yiran Shen<sup>1</sup>, David A. Ostrov<sup>2</sup>, Santosh Rananaware<sup>3</sup>, Piyush K Jain<sup>3</sup>, Cuong Q. Nguyen<sup>1,4,5</sup>

<sup>1</sup>Department of Infectious Diseases and Immunology, <sup>2</sup>Department of Pathology, Immunology & Laboratory Medicine, <sup>3</sup>Department of Chemical Engineering, <sup>4</sup>Department of Oral Biology, College of Dentistry, <sup>5</sup>Center of Orphaned Autoimmune Diseases, University of Florida, Gainesville, Florida, 32611-0880 USA.

Address correspondence:

Cuong Q. Nguyen, PhD

Department of Infectious Diseases and Immunology

PO Box 110880, College of Veterinary Medicine

University of Florida, Gainesville, Florida 32611-0880 USA

Telephone: 352-294-4180, Fax: 352-392-9704

Email: [nguyenc@ufl.edu](mailto:nguyenc@ufl.edu)

**Table S1 Full list of alleles from genotyping: the number of alleles at the HLA-A, -B, -C, -DPA1, -DPB1, -DQA1, -DQB1, -DRB1 loci were 30, 46, 20, 5, 20, 7, 16, and 32, respectively.**

| Allele         | COVID-19 |               | Control group |               | Odds ratio (95% CI)       | P-value  |
|----------------|----------|---------------|---------------|---------------|---------------------------|----------|
|                | N        | Frequency (%) | N             | Frequency (%) |                           |          |
| <b>A*01:01</b> | 17       | 10.3659       | 18            | 12.1622       | 0.8357(0.3933 - 1.7448)   | - 0.7200 |
| <b>A*02:01</b> | 29       | 17.6829       | 39            | 26.3514       | 0.6014(0.3418 - 1.0602)   | - 0.0745 |
| <b>A*02:02</b> | 2        | 1.2195        | 1             | 0.6757        | 1.8115(0.1405 - 52.9657)  | - 0.9288 |
| <b>A*02:05</b> | 1        | 0.6098        | 1             | 0.6757        | 0.9021(0.0233 - 34.9456)  | - 0.5238 |
| <b>A*02:06</b> | 0        | 0.0000        | 1             | 0.6757        | 0(0 - 17.1463)            | 0.4744   |
| <b>A*03:01</b> | 17       | 10.3659       | 16            | 10.8108       | 0.9542(0.437 - 2.0133)    | 0.9548   |
| <b>A*11:01</b> | 9        | 5.4878        | 11            | 7.4324        | 0.7239(0.2631 - 1.8442)   | - 0.4983 |
| <b>A*23:01</b> | 9        | 5.4878        | 4             | 2.7027        | 2.0856(0.6398 - 7.4491)   | - 0.2651 |
| <b>A*24:02</b> | 15       | 9.1463        | 10            | 6.7568        | 1.3878(0.5683 - 3.2532)   | - 0.5327 |
| <b>A*25:01</b> | 3        | 1.8293        | 3             | 2.0270        | 0.9009(0.1606 - 5.0545)   | - 0.7751 |
| <b>A*26:01</b> | 4        | 2.4390        | 6             | 4.0541        | 0.5927(0.154 - 2.3371)    | 0.5262   |
| <b>A*26:08</b> | 0        | 0.0000        | 1             | 0.6757        | 0(0 - 17.1463)            | 0.4744   |
| <b>A*29:01</b> | 0        | 0.0000        | 1             | 0.6757        | 0(0 - 17.1463)            | 0.4744   |
| <b>A*29:02</b> | 4        | 2.4390        | 7             | 4.7297        | 0.5047(0.1353 - 1.7824)   | - 0.3609 |
| <b>A*30:01</b> | 8        | 4.8780        | 1             | 0.6757        | 7.5017(1.1526 - 165.9402) | - 0.0386 |
| <b>A*30:02</b> | 7        | 4.2683        | 3             | 2.0270        | 2.15(0.5601 - 9.805)      | 0.3424   |
| <b>A*31:01</b> | 2        | 1.2195        | 4             | 2.7027        | 0.4456(0.059 - 2.4295)    | 0.4281   |
| <b>A*32:01</b> | 4        | 2.4390        | 0             | 0.0000        | Inf(0.8162 - Inf)         | 0.1246   |
| <b>A*33:01</b> | 2        | 1.2195        | 4             | 2.7027        | 0.4456(0.059 - 2.4295)    | 0.4281   |
| <b>A*33:03</b> | 3        | 1.8293        | 3             | 2.0270        | 0.9009(0.1606 - 5.0545)   | - 0.7751 |
| <b>A*34:01</b> | 2        | 1.2195        | 0             | 0.0000        | Inf(0.2602 - Inf)         | 0.4997   |
| <b>A*34:02</b> | 4        | 2.4390        | 1             | 0.6757        | 3.6616(0.4708 - 89.6824)  | - 0.3743 |
| <b>A*36:01</b> | 3        | 1.8293        | 1             | 0.6757        | 2.7309(0.2978 - 71.21)    | 0.6246   |
| <b>A*66:01</b> | 2        | 1.2195        | 0             | 0.0000        | Inf(0.2602 - Inf)         | 0.4997   |
| <b>A*66:02</b> | 1        | 0.6098        | 0             | 0.0000        | Inf(0.0475 - Inf)         | 0.9590   |
| <b>A*68:01</b> | 4        | 2.4390        | 8             | 5.4054        | 0.4386(0.1205 - 1.5882)   | - 0.2400 |
| <b>A*68:02</b> | 2        | 1.2195        | 2             | 1.3514        | 0.9015(0.0964 - 8.4273)   | - 0.6888 |
| <b>A*68:17</b> | 0        | 0.0000        | 1             | 0.6757        | 0(0 - 17.1463)            | 0.4744   |

|                |    |        |    |         |                             |   |        |
|----------------|----|--------|----|---------|-----------------------------|---|--------|
| <b>A*74:01</b> | 9  | 5.4878 | 1  | 0.6757  | 8.4924(1.2738<br>185.6196)  | - | 0.0211 |
| <b>A*80:01</b> | 1  | 0.6098 | 0  | 0.0000  | Inf(0.0475 - Inf)           |   | 0.9590 |
| <b>B*07:02</b> | 13 | 9.5588 | 9  | 7.7586  | 1.2554(0.4989 - 3.363)      |   | 0.6603 |
| <b>B*07:05</b> | 1  | 0.7353 | 2  | 1.7241  | 0.4236(0.0145<br>5.4739)    | - | 0.5959 |
| <b>B*08:01</b> | 13 | 9.5588 | 12 | 10.3448 | 0.9163(0.3955 - 2.195)      |   | 0.8363 |
| <b>B*13:02</b> | 2  | 1.4706 | 2  | 1.7241  | 0.8513(0.0908<br>7.9793)    | - | 0.7300 |
| <b>B*14:01</b> | 1  | 0.7353 | 4  | 3.4483  | 0.2085(0.0085<br>1.6275)    | - | 0.1836 |
| <b>B*14:02</b> | 6  | 4.4118 | 4  | 3.4483  | 1.291(0.3243 - 4.992)       |   | 0.7569 |
| <b>B*15:01</b> | 8  | 5.8824 | 5  | 4.3103  | 1.3857(0.4156<br>4.4814)    | - | 0.7765 |
| <b>B*15:03</b> | 6  | 4.4118 | 1  | 0.8621  | 5.2797(0.7152<br>121.2847)  | - | 0.1281 |
| <b>B*15:10</b> | 0  | 0.0000 | 1  | 0.8621  | 0(0 - 16.2059)              |   | 0.4603 |
| <b>B*15:16</b> | 1  | 0.7353 | 2  | 1.7241  | 0.4236(0.0145<br>5.4739)    | - | 0.5959 |
| <b>B*15:17</b> | 0  | 0.0000 | 2  | 1.7241  | 0(0 - 2.9543)               |   | 0.2109 |
| <b>B*15:26</b> | 1  | 0.7353 | 0  | 0.0000  | Inf(0.0449 - Inf)           |   | 0.9364 |
| <b>B*18:01</b> | 5  | 3.6765 | 3  | 2.5862  | 1.4356(0.3428<br>7.0318)    | - | 0.7292 |
| <b>B*27:05</b> | 3  | 2.2059 | 8  | 6.8966  | 0.3059(0.0683<br>1.2853)    | - | 0.1186 |
| <b>B*35:01</b> | 6  | 4.4118 | 5  | 4.3103  | 1.0245(0.2807 - 3.513)      |   | 0.7871 |
| <b>B*35:02</b> | 2  | 1.4706 | 1  | 0.8621  | 1.7129(0.1326<br>50.1855)   | - | 0.8897 |
| <b>B*35:03</b> | 1  | 0.7353 | 2  | 1.7241  | 0.4236(0.0145<br>5.4739)    | - | 0.5959 |
| <b>B*37:01</b> | 1  | 0.7353 | 1  | 0.8621  | 0.8524(0.022<br>33.0693)    | - | 0.5491 |
| <b>B*38:01</b> | 1  | 0.7353 | 1  | 0.8621  | 0.8524(0.022<br>33.0693)    | - | 0.5491 |
| <b>B*38:02</b> | 1  | 0.7353 | 0  | 0.0000  | Inf(0.0449 - Inf)           |   | 0.9364 |
| <b>B*39:01</b> | 4  | 2.9412 | 2  | 1.7241  | 1.7237(0.3149<br>13.0633)   | - | 0.6898 |
| <b>B*39:06</b> | 1  | 0.7353 | 0  | 0.0000  | Inf(0.0449 - Inf)           |   | 0.9364 |
| <b>B*39:10</b> | 1  | 0.7353 | 0  | 0.0000  | Inf(0.0449 - Inf)           |   | 0.9364 |
| <b>B*40:01</b> | 5  | 3.6765 | 8  | 6.8966  | 0.5166(0.1597<br>1.7222)    | - | 0.2688 |
| <b>B*40:02</b> | 2  | 1.4706 | 1  | 0.8621  | 1.7129(0.1326<br>50.1855)   | - | 0.8897 |
| <b>B*40:06</b> | 0  | 0.0000 | 1  | 0.8621  | 0(0 - 16.2059)              |   | 0.4603 |
| <b>B*41:01</b> | 0  | 0.0000 | 3  | 2.5862  | 0(0 - 1.4517)               |   | 0.0962 |
| <b>B*42:01</b> | 6  | 4.4118 | 0  | 0.0000  | 11.6054(0.6467<br>208.2604) | - | 0.0323 |

|                |    |         |    |         |                          |        |
|----------------|----|---------|----|---------|--------------------------|--------|
| <b>B*44:02</b> | 5  | 3.6765  | 10 | 8.6207  | 0.406(0.1303 - 1.3326)   | 0.1145 |
| <b>B*44:03</b> | 8  | 5.8824  | 5  | 4.3103  | 1.3857(0.4156 - 4.4814)  | 0.7765 |
| <b>B*45:01</b> | 2  | 1.4706  | 3  | 2.5862  | 0.5635(0.0689 - 3.6814)  | 0.6639 |
| <b>B*47:01</b> | 1  | 0.7353  | 0  | 0.0000  | Inf(0.0449 - Inf)        | 0.9364 |
| <b>B*49:01</b> | 5  | 3.6765  | 0  | 0.0000  | Inf(0.8507 - Inf)        | 0.0639 |
| <b>B*50:01</b> | 3  | 2.2059  | 0  | 0.0000  | Inf(0.4998 - Inf)        | 0.2518 |
| <b>B*51:01</b> | 0  | 0.0000  | 5  | 4.3103  | 0.0743(0.0041 - 1.3576)  | 0.0197 |
| <b>B*51:08</b> | 1  | 0.7353  | 0  | 0.0000  | Inf(0.0449 - Inf)        | 0.9364 |
| <b>B*52:01</b> | 1  | 0.7353  | 2  | 1.7241  | 0.4236(0.0145 - 5.4739)  | 0.5959 |
| <b>B*53:01</b> | 3  | 2.2059  | 2  | 1.7241  | 1.2844(0.1966 - 10.5059) | 0.8573 |
| <b>B*55:01</b> | 1  | 0.7353  | 2  | 1.7241  | 0.4236(0.0145 - 5.4739)  | 0.5959 |
| <b>B*56:01</b> | 1  | 0.7353  | 1  | 0.8621  | 0.8524(0.022 - 33.0693)  | 0.5491 |
| <b>B*57:01</b> | 4  | 2.9412  | 3  | 2.5862  | 1.1408(0.2438 - 5.9027)  | 0.8308 |
| <b>B*57:02</b> | 1  | 0.7353  | 0  | 0.0000  | Inf(0.0449 - Inf)        | 0.9364 |
| <b>B*57:03</b> | 3  | 2.2059  | 1  | 0.8621  | 2.585(0.2811 - 67.5593)  | 0.6268 |
| <b>B*58:01</b> | 3  | 2.2059  | 0  | 0.0000  | Inf(0.4998 - Inf)        | 0.2518 |
| <b>B*58:02</b> | 3  | 2.2059  | 1  | 0.8621  | 2.585(0.2811 - 67.5593)  | 0.6268 |
| <b>B*81:01</b> | 0  | 0.0000  | 1  | 0.8621  | 0(0 - 16.2059)           | 0.4603 |
| <b>C*01:02</b> | 7  | 4.6053  | 4  | 2.8571  | 1.6387(0.4637 - 6.1211)  | 0.5449 |
| <b>C*02:02</b> | 7  | 4.6053  | 9  | 6.4286  | 0.7035(0.2169 - 2.053)   | 0.6092 |
| <b>C*03:02</b> | 1  | 0.6579  | 0  | 0.0000  | Inf(0.0485 - Inf)        | 0.9671 |
| <b>C*03:03</b> | 6  | 3.9474  | 4  | 2.8571  | 1.3957(0.353 - 5.3785)   | 0.7518 |
| <b>C*03:04</b> | 13 | 8.5526  | 13 | 9.2857  | 0.914(0.4046 - 2.0649)   | 0.8402 |
| <b>C*04:01</b> | 25 | 16.4474 | 16 | 11.4286 | 1.5234(0.7649 - 3.1659)  | 0.2410 |
| <b>C*05:01</b> | 9  | 5.9211  | 14 | 10.0000 | 0.5675(0.2175 - 1.3523)  | 0.2768 |
| <b>C*06:02</b> | 17 | 11.1842 | 11 | 7.8571  | 1.4748(0.6602 - 3.5313)  | 0.4270 |
| <b>C*07:01</b> | 18 | 11.8421 | 17 | 12.1429 | 0.972(0.4626 - 2.0768)   | 0.9193 |
| <b>C*07:02</b> | 19 | 12.5000 | 12 | 8.5714  | 1.5216(0.6783 - 3.3219)  | 0.3427 |
| <b>C*07:04</b> | 0  | 0.0000  | 3  | 2.1429  | 0(0 - 1.5701)            | 0.1090 |
| <b>C*08:02</b> | 9  | 5.9211  | 8  | 5.7143  | 1.0383(0.3533 - 2.8246)  | 0.8613 |
| <b>C*12:02</b> | 0  | 0.0000  | 2  | 1.4286  | 0(0 - 3.1922)            | 0.2290 |

|                   |     |         |     |         |                            |   |        |
|-------------------|-----|---------|-----|---------|----------------------------|---|--------|
| <b>C*12:03</b>    | 4   | 2.6316  | 3   | 2.1429  | 1.2333(0.2644<br>6.3638)   | - | 0.9123 |
| <b>C*14:02</b>    | 1   | 0.6579  | 4   | 2.8571  | 0.2262(0.0092<br>1.7608)   | - | 0.1977 |
| <b>C*15:02</b>    | 4   | 2.6316  | 4   | 2.8571  | 0.9192(0.2156 - 3.918)     |   | 0.8097 |
| <b>C*16:01</b>    | 4   | 2.6316  | 8   | 5.7143  | 0.4471(0.1226 - 1.624)     |   | 0.2418 |
| <b>C*16:02</b>    | 1   | 0.6579  | 2   | 1.4286  | 0.4581(0.0157<br>5.9103)   | - | 0.6088 |
| <b>C*17:01</b>    | 4   | 2.6316  | 3   | 2.1429  | 1.2333(0.2644<br>6.3638)   | - | 0.9123 |
| <b>C*18:01</b>    | 3   | 1.9737  | 3   | 2.1429  | 0.9197(0.1638<br>5.1651)   | - | 0.7558 |
| <b>DPA1*01:03</b> | 101 | 60.1190 | 107 | 72.2973 | 0.5786(0.3551<br>0.9401)   | - | 0.0244 |
| <b>DPA1*01:04</b> | 1   | 0.5952  | 1   | 0.6757  | 0.8806(0.0227<br>34.1086)  | - | 0.5347 |
| <b>DPA1*02:01</b> | 39  | 23.2143 | 31  | 20.9459 | 1.1406(0.6558<br>1.9565)   | - | 0.6846 |
| <b>DPA1*02:02</b> | 17  | 10.1190 | 8   | 5.4054  | 1.9661(0.7972<br>4.8757)   | - | 0.1457 |
| <b>DPA1*03:01</b> | 10  | 5.9524  | 1   | 0.6757  | 9.2568(1.3264<br>200.3514) | - | 0.0120 |
| <b>DPB1*01:01</b> | 23  | 15.5405 | 8   | 5.7971  | 2.9792(1.2446 - 7.258)     |   | 0.0123 |
| <b>DPB1*02:01</b> | 23  | 15.5405 | 19  | 13.7681 | 1.1518(0.5835<br>2.2667)   | - | 0.7393 |
| <b>DPB1*03:01</b> | 8   | 5.4054  | 13  | 9.4203  | 0.5506(0.2161<br>1.4255)   | - | 0.2571 |
| <b>DPB1*04:01</b> | 43  | 29.0541 | 53  | 38.4058 | 0.6578(0.3906 - 1.087)     |   | 0.1042 |
| <b>DPB1*04:02</b> | 19  | 12.8378 | 10  | 7.2464  | 1.8812(0.8315<br>4.3458)   | - | 0.1692 |
| <b>DPB1*05:01</b> | 3   | 2.0270  | 3   | 2.1739  | 0.9313(0.1658<br>5.2316)   | - | 0.7442 |
| <b>DPB1*06:01</b> | 3   | 2.0270  | 3   | 2.1739  | 0.9313(0.1658<br>5.2316)   | - | 0.7442 |
| <b>DPB1*09:01</b> | 2   | 1.3514  | 2   | 1.4493  | 0.9318(0.0996<br>8.7183)   | - | 0.6647 |
| <b>DPB1*10:01</b> | 2   | 1.3514  | 5   | 3.6232  | 0.3656(0.0508<br>1.7964)   | - | 0.2682 |
| <b>DPB1*11:01</b> | 2   | 1.3514  | 9   | 6.5217  | 0.1974(0.0301<br>0.9301)   | - | 0.0301 |
| <b>DPB1*13:01</b> | 5   | 3.3784  | 1   | 0.7246  | 4.7683(0.6329<br>112.3687) | - | 0.2155 |
| <b>DPB1*14:01</b> | 2   | 1.3514  | 2   | 1.4493  | 0.9318(0.0996<br>8.7183)   | - | 0.6647 |
| <b>DPB1*15:01</b> | 1   | 0.6757  | 1   | 0.7246  | 0.9322(0.0241<br>36.1305)  | - | 0.5090 |
| <b>DPB1*16:01</b> | 1   | 0.6757  | 1   | 0.7246  | 0.9322(0.0241<br>36.1305)  | - | 0.5090 |

|                   |    |         |    |         |                            |        |
|-------------------|----|---------|----|---------|----------------------------|--------|
| <b>DPB1*17:01</b> | 5  | 3.3784  | 4  | 2.8986  | 1.1707(0.308 - 4.7058)     | 0.9151 |
| <b>DPB1*18:01</b> | 1  | 0.6757  | 2  | 1.4493  | 0.4638(0.0159 - 5.9843)    | 0.6109 |
| <b>DPB1*19:01</b> | 1  | 0.6757  | 2  | 1.4493  | 0.4638(0.0159 - 5.9843)    | 0.6109 |
| <b>DPB1*26:01</b> | 1  | 0.6757  | 0  | 0.0000  | Inf(0.0491 - Inf)          | 0.9720 |
| <b>DPB1*40:01</b> | 2  | 1.3514  | 0  | 0.0000  | Inf(0.2689 - Inf)          | 0.4989 |
| <b>DPB1*85:01</b> | 1  | 0.6757  | 0  | 0.0000  | Inf(0.0491 - Inf)          | 0.9720 |
| <b>DQA1*01:01</b> | 20 | 13.1579 | 22 | 15.9420 | 0.7995(0.3938 - 1.5854)    | 0.5096 |
| <b>DQA1*01:02</b> | 42 | 27.6316 | 33 | 23.9130 | 1.2141(0.7066 - 2.121)     | 0.5038 |
| <b>DQA1*01:03</b> | 8  | 5.2632  | 12 | 8.6957  | 0.5844(0.2273 - 1.5958)    | 0.3537 |
| <b>DQA1*02:01</b> | 14 | 9.2105  | 26 | 18.8406 | 0.4383(0.2122 - 0.8942)    | 0.0257 |
| <b>DQA1*03:01</b> | 22 | 14.4737 | 21 | 15.2174 | 0.9431(0.4802 - 1.8702)    | 0.8702 |
| <b>DQA1*04:01</b> | 6  | 3.9474  | 2  | 1.4493  | 2.7858(0.4998 - 19.382)    | 0.2869 |
| <b>DQA1*05:01</b> | 40 | 26.3158 | 22 | 15.9420 | 1.8791(1.0435 - 3.5288)    | 0.0326 |
| <b>DQB1*02:01</b> | 18 | 11.2500 | 14 | 10.1449 | 1.1223(0.5099 - 2.4659)    | 0.8519 |
| <b>DQB1*02:02</b> | 8  | 5.0000  | 14 | 10.1449 | 0.4674(0.185 - 1.1564)     | 0.1194 |
| <b>DQB1*03:01</b> | 21 | 13.1250 | 18 | 13.0435 | 1.0072(0.4873 - 2.0192)    | 0.8796 |
| <b>DQB1*03:02</b> | 13 | 8.1250  | 15 | 10.8696 | 0.726(0.3232 - 1.6491)     | 0.4334 |
| <b>DQB1*03:03</b> | 8  | 5.0000  | 7  | 5.0725  | 0.985(0.3363 - 3.1954)     | 0.8125 |
| <b>DQB1*03:19</b> | 7  | 4.3750  | 0  | 0.0000  | 13.5342(0.7659 - 239.1722) | 0.0163 |
| <b>DQB1*04:02</b> | 7  | 4.3750  | 3  | 2.1739  | 2.0541(0.5348 - 9.376)     | 0.3491 |
| <b>DQB1*05:01</b> | 21 | 13.1250 | 23 | 16.6667 | 0.7561(0.3852 - 1.4543)    | 0.4163 |
| <b>DQB1*05:02</b> | 4  | 2.5000  | 3  | 2.1739  | 1.1533(0.2473 - 5.9491)    | 0.8429 |
| <b>DQB1*05:03</b> | 4  | 2.5000  | 4  | 2.8986  | 0.8594(0.2017 - 3.6621)    | 0.8830 |
| <b>DQB1*05:04</b> | 1  | 0.6250  | 0  | 0.0000  | Inf(0.0454 - Inf)          | 0.9409 |
| <b>DQB1*06:01</b> | 2  | 1.2500  | 2  | 1.4493  | 0.8612(0.0921 - 8.0547)    | 0.7221 |
| <b>DQB1*06:02</b> | 30 | 18.7500 | 18 | 13.0435 | 1.5363(0.7976 - 2.9717)    | 0.2077 |
| <b>DQB1*06:03</b> | 10 | 6.2500  | 9  | 6.5217  | 0.9557(0.3631 - 2.7037)    | 0.8871 |
| <b>DQB1*06:04</b> | 3  | 1.8750  | 6  | 4.3478  | 0.4216(0.0897 - 1.8947)    | 0.3112 |
| <b>DQB1*06:09</b> | 3  | 1.8750  | 2  | 1.4493  | 1.2982(0.1992 - 10.5931)   | 0.8674 |

|                   |    |         |    |         |                          |        |
|-------------------|----|---------|----|---------|--------------------------|--------|
| <b>DRB1*01:01</b> | 8  | 5.4795  | 13 | 10.0000 | 0.523(0.2051 - 1.3577)   | 0.1777 |
| <b>DRB1*01:02</b> | 4  | 2.7397  | 1  | 0.7692  | 3.619(0.4645 - 88.7575)  | 0.3747 |
| <b>DRB1*03:01</b> | 17 | 11.6438 | 10 | 7.6923  | 1.5788(0.6831 - 3.6726)  | 0.3137 |
| <b>DRB1*03:02</b> | 1  | 0.6849  | 2  | 1.5385  | 0.4426(0.0151 - 5.7137)  | 0.6030 |
| <b>DRB1*04:01</b> | 8  | 5.4795  | 9  | 6.9231  | 0.7801(0.2858 - 2.2825)  | 0.6271 |
| <b>DRB1*04:02</b> | 1  | 0.6849  | 1  | 0.7692  | 0.89(0.023 - 34.5052)    | 0.5297 |
| <b>DRB1*04:03</b> | 0  | 0.0000  | 1  | 0.7692  | 0(0 - 16.9178)           | 0.4710 |
| <b>DRB1*04:04</b> | 3  | 2.0548  | 5  | 3.8462  | 0.5257(0.1075 - 2.1972)  | 0.4815 |
| <b>DRB1*04:05</b> | 2  | 1.3699  | 0  | 0.0000  | Inf(0.2568 - Inf)        | 0.4999 |
| <b>DRB1*04:07</b> | 0  | 0.0000  | 1  | 0.7692  | 0(0 - 16.9178)           | 0.4710 |
| <b>DRB1*07:01</b> | 14 | 9.5890  | 23 | 17.6923 | 0.4947(0.2338 - 1.0588)  | 0.0532 |
| <b>DRB1*08:01</b> | 2  | 1.3699  | 1  | 0.7692  | 1.788(0.1385 - 52.3379)  | 0.9194 |
| <b>DRB1*08:04</b> | 1  | 0.6849  | 0  | 0.0000  | Inf(0.0469 - Inf)        | 0.9536 |
| <b>DRB1*08:06</b> | 1  | 0.6849  | 0  | 0.0000  | Inf(0.0469 - Inf)        | 0.9536 |
| <b>DRB1*09:01</b> | 2  | 1.3699  | 1  | 0.7692  | 1.788(0.1385 - 52.3379)  | 0.9194 |
| <b>DRB1*10:01</b> | 3  | 2.0548  | 2  | 1.5385  | 1.3412(0.2056 - 10.9552) | 0.8957 |
| <b>DRB1*11:01</b> | 10 | 6.8493  | 9  | 6.9231  | 0.9886(0.3738 - 2.8097)  | 0.8306 |
| <b>DRB1*11:02</b> | 4  | 2.7397  | 2  | 1.5385  | 1.7991(0.3293 - 13.6148) | 0.6873 |
| <b>DRB1*11:04</b> | 4  | 2.7397  | 2  | 1.5385  | 1.7991(0.3293 - 13.6148) | 0.6873 |
| <b>DRB1*12:01</b> | 1  | 0.6849  | 4  | 3.0769  | 0.2183(0.0089 - 1.701)   | 0.1912 |
| <b>DRB1*13:01</b> | 15 | 10.2740 | 10 | 7.6923  | 1.3725(0.5565 - 3.2232)  | 0.5314 |
| <b>DRB1*13:02</b> | 6  | 4.1096  | 10 | 7.6923  | Inf(0.5217 - Inf)        | 0.2498 |
| <b>DRB1*13:03</b> | 3  | 2.0548  | 0  | 0.0000  | 0.5155(0.1738 - 1.563)   | 0.3021 |
| <b>DRB1*13:04</b> | 5  | 3.4247  | 0  | 0.0000  | Inf(0.8889 - Inf)        | 0.0623 |
| <b>DRB1*14:01</b> | 2  | 1.3699  | 2  | 1.5385  | 0.8893(0.095 - 8.3249)   | 0.6984 |
| <b>DRB1*14:02</b> | 2  | 1.3699  | 0  | 0.0000  | Inf(0.2568 - Inf)        | 0.4999 |
| <b>DRB1*14:03</b> | 1  | 0.6849  | 0  | 0.0000  | Inf(0.0469 - Inf)        | 0.9536 |
| <b>DRB1*15:01</b> | 13 | 8.9041  | 12 | 9.2308  | 0.9613(0.4181 - 2.2854)  | 0.9079 |
| <b>DRB1*15:02</b> | 2  | 1.3699  | 2  | 1.5385  | 0.8893(0.095 - 8.3249)   | 0.6984 |
| <b>DRB1*15:03</b> | 9  | 6.1644  | 4  | 3.0769  | 2.0642(0.6294 - 7.3926)  | 0.2661 |
| <b>DRB1*16:01</b> | 1  | 0.6849  | 3  | 2.3077  | 0.2932(0.0112 - 2.6928)  | 0.3456 |

---

|                   |   |        |   |        |                   |        |
|-------------------|---|--------|---|--------|-------------------|--------|
| <b>DRB1*16:02</b> | 1 | 0.6849 | 0 | 0.0000 | lnf(0.0469 - lnf) | 0.9536 |
|-------------------|---|--------|---|--------|-------------------|--------|

---

**Table S2 High rates of ambiguous imputation in HLA-DRB/3/4/5.**

| <b>Alleles</b>        | <b>Frequency (%)</b> |
|-----------------------|----------------------|
| <b>DRB3*01:01</b>     | 18.1818              |
| <b>DRB3*02:02</b>     | 22.0779              |
| <b>DRB3*02:10</b>     | 0.6494               |
| <b>DRB3*03:01</b>     | 7.1429               |
| <b>DRB3*undefined</b> | 51.9481              |
| <b>DRB4*01:01</b>     | 5.4217               |
| <b>DRB4*01:03</b>     | 16.2651              |
| <b>DRB4*undefined</b> | 78.3133              |
| <b>DRB5*01:01</b>     | 13.6905              |
| <b>DRB5*01:02</b>     | 0.5952               |
| <b>DRB5*02:02</b>     | 1.7857               |
| <b>DRB5*undefined</b> | 83.9286              |

**Table S3 Summary of alleles genotyping in the black population: the number of alleles at the HLA-A, -B, -C, -DPA1, -DPB1, -DQA1, -DQB1, -DRB1 loci were 19, 18,17, 4, 12, 6, 11 and 19, respectively.**

| Allele  | COVID-19 |               | Control group |               | Odds ratio (95% CI)    | P-value |
|---------|----------|---------------|---------------|---------------|------------------------|---------|
|         | N        | Frequency (%) | N             | Frequency (%) |                        |         |
| A*01:01 | 3        | 7.8947        | 1             | 7.1429        | 1.112(0.1117-30.936)   | 1       |
| A*02:01 | 1        | 2.6316        | 4             | 28.5714       | 0.0722(0.0027-0.6233)  | 0.0154  |
| A*02:02 | 1        | 2.6316        | 0             | 0.0000        | Inf(0.0194-Inf)        | 1       |
| A*03:01 | 2        | 5.2632        | 1             | 7.1429        | 0.7271(0.0529-22.5142) | 1       |
| A*11:01 | 1        | 2.6316        | 0             | 0.0000        | Inf(0.0194-Inf)        | 1       |
| A*23:01 | 3        | 7.8947        | 1             | 7.1429        | 1.112(0.1117-30.936)   | 1       |
| A*24:02 | 1        | 2.6316        | 0             | 0.0000        | Inf(0.0194-Inf)        | 1       |
| A*26:01 | 1        | 2.6316        | 0             | 0.0000        | Inf(0.0194-Inf)        | 1       |
| A*29:02 | 1        | 2.6316        | 2             | 14.2857       | 0.1693(0.0055-2.3288)  | 0.1729  |
| A*30:01 | 5        | 13.1579       | 0             | 0.0000        | Inf(0.3866-Inf)        | 0.307   |
| A*30:02 | 3        | 7.8947        | 0             | 0.0000        | Inf(0.2129-Inf)        | 0.5547  |
| A*33:01 | 0        | 0.0000        | 2             | 14.2857       | 0(0-1.2349)            | 0.0686  |
| A*33:03 | 3        | 7.8947        | 1             | 7.1429        | 1.112(0.1117-30.936)   | 1       |
| A*34:02 | 2        | 5.2632        | 1             | 7.1429        | 0.7271(0.0529-22.5142) | 1       |
| A*36:01 | 2        | 5.2632        | 0             | 0.0000        | Inf(0.1048-Inf)        | 1       |
| A*66:01 | 2        | 5.2632        | 0             | 0.0000        | Inf(0.1048-Inf)        | 1       |
| A*68:01 | 1        | 2.6316        | 1             | 7.1429        | 0.3598(0.0089-14.5474) | 0.4698  |
| A*68:02 | 1        | 2.6316        | 0             | 0.0000        | Inf(0.0194-Inf)        | 1       |
| A*74:01 | 5        | 13.1579       | 0             | 0.0000        | Inf(0.3866-Inf)        | 0.307   |
| B*07:02 | 1        | 3.5714        | 0             | 0.0000        | Inf(0.0113-Inf)        | 1       |
| B*08:01 | 4        | 14.2857       | 1             | 16.6667       | 0.838(0.0823-24.146)   | 1       |
| B*14:02 | 2        | 7.1429        | 0             | 0.0000        | Inf(0.0589-Inf)        | 1       |
| B*15:03 | 4        | 14.2857       | 0             | 0.0000        | Inf(0.1645-Inf)        | 0.5762  |
| B*15:16 | 1        | 3.5714        | 1             | 16.6667       | 0.1992(0.0047-8.5328)  | 0.3262  |
| B*15:17 | 0        | 0.0000        | 1             | 16.6667       | 0(0-4.0714)            | 0.1765  |
| B*27:05 | 0        | 0.0000        | 1             | 16.6667       | 0(0-4.0714)            | 0.1765  |
| B*35:01 | 1        | 3.5714        | 1             | 16.6667       | 0.1992(0.0047-8.5328)  | 0.3262  |
| B*39:10 | 1        | 3.5714        | 0             | 0.0000        | Inf(0.0113-Inf)        | 1       |
| B*42:01 | 2        | 7.1429        | 0             | 0.0000        | Inf(0.0589-Inf)        | 1       |
| B*44:03 | 1        | 3.5714        | 0             | 0.0000        | Inf(0.0113-Inf)        | 1       |
| B*45:01 | 1        | 3.5714        | 0             | 0.0000        | Inf(0.0113-Inf)        | 1       |
| B*49:01 | 1        | 3.5714        | 0             | 0.0000        | Inf(0.0113-Inf)        | 1       |
| B*50:01 | 1        | 3.5714        | 0             | 0.0000        | Inf(0.0113-Inf)        | 1       |
| B*53:01 | 0        | 0.0000        | 1             | 16.6667       | 0(0-4.0714)            | 0.1765  |
| B*57:03 | 2        | 7.1429        | 0             | 0.0000        | Inf(0.0589-Inf)        | 1       |
| B*58:01 | 3        | 10.7143       | 0             | 0.0000        | Inf(0.1173-Inf)        | 1       |
| B*58:02 | 3        | 10.7143       | 0             | 0.0000        | Inf(0.1173-Inf)        | 1       |
| C*01:02 | 2        | 6.6667        | 1             | 7.1429        | 0.9302(0.0673-28.9434) | 1       |
| C*02:02 | 0        | 0.0000        | 1             | 7.1429        | 0(0-8.8667)            | 0.3182  |
| C*03:02 | 1        | 3.3333        | 0             | 0.0000        | Inf(0.0246-Inf)        | 1       |

|                   |    |         |   |         |                        |        |
|-------------------|----|---------|---|---------|------------------------|--------|
| <b>C*03:04</b>    | 2  | 6.6667  | 0 | 0.0000  | Inf(0.1334-Inf)        | 0.556  |
| <b>C*04:01</b>    | 4  | 13.3333 | 4 | 28.5714 | 0.394(0.0786-1.9557)   | 0.4024 |
| <b>C*05:01</b>    | 0  | 0.0000  | 1 | 7.1429  | 0(0-8.8667)            | 0.3182 |
| <b>C*06:02</b>    | 7  | 23.3333 | 1 | 7.1429  | 3.8567(0.4904-94.3989) | 0.2477 |
| <b>C*07:01</b>    | 4  | 13.3333 | 2 | 14.2857 | 0.9248(0.1496-7.7518)  | 1      |
| <b>C*07:02</b>    | 2  | 6.6667  | 0 | 0.0000  | Inf(0.1334-Inf)        | 0.556  |
| <b>C*08:02</b>    | 3  | 10.0000 | 0 | 0.0000  | Inf(0.2724-Inf)        | 0.5402 |
| <b>C*12:03</b>    | 1  | 3.3333  | 0 | 0.0000  | Inf(0.0246-Inf)        | 1      |
| <b>C*14:02</b>    | 1  | 3.3333  | 1 | 7.1429  | 0.4574(0.0113-18.559)  | 1      |
| <b>C*15:02</b>    | 0  | 0.0000  | 1 | 7.1429  | 0(0-8.8667)            | 0.3182 |
| <b>C*16:01</b>    | 1  | 3.3333  | 0 | 0.0000  | Inf(0.0246-Inf)        | 1      |
| <b>C*16:02</b>    | 0  | 0.0000  | 1 | 7.1429  | 0(0-8.8667)            | 0.3182 |
| <b>C*17:01</b>    | 1  | 3.3333  | 1 | 7.1429  | 0.4574(0.0113-18.559)  | 1      |
| <b>C*18:01</b>    | 1  | 3.3333  | 0 | 0.0000  | Inf(0.0246-Inf)        | 1      |
| <b>DPA1*01:03</b> | 17 | 44.7368 | 6 | 42.8571 | 1.0778(0.2999-4.3623)  | 1      |
| <b>DPA1*02:01</b> | 13 | 34.2105 | 9 | 64.2857 | 0.2963(0.08-1.2079)    | 0.0647 |
| <b>DPA1*02:02</b> | 3  | 7.8947  | 0 | 0.0000  | Inf(0.2129-Inf)        | 0.5547 |
| <b>DPA1*03:01</b> | 5  | 13.1579 | 1 | 7.1429  | 1.9474(0.2086-49.3099) | 0.6701 |
| <b>DPB1*01:01</b> | 6  | 17.6471 | 4 | 28.5714 | 0.5433(0.1203-2.4539)  | 0.448  |
| <b>DPB1*02:01</b> | 7  | 20.5882 | 2 | 14.2857 | 1.5422(0.2417-11.6885) | 0.7081 |
| <b>DPB1*03:01</b> | 0  | 0.0000  | 1 | 7.1429  | 0(0-7.8235)            | 0.2917 |
| <b>DPB1*04:01</b> | 4  | 11.7647 | 2 | 14.2857 | 0.8039(0.1307-6.7057)  | 1      |
| <b>DPB1*04:02</b> | 5  | 14.7059 | 0 | 0.0000  | Inf(0.44-Inf)          | 0.3028 |
| <b>DPB1*11:01</b> | 1  | 2.9412  | 2 | 14.2857 | 0.1896(0.0061-2.6143)  | 0.1999 |
| <b>DPB1*13:01</b> | 2  | 5.8824  | 0 | 0.0000  | Inf(0.1174-Inf)        | 0.578  |
| <b>DPB1*14:01</b> | 1  | 2.9412  | 1 | 7.1429  | 0.4028(0.0099-16.3102) | 1      |
| <b>DPB1*17:01</b> | 4  | 11.7647 | 1 | 7.1429  | 1.7155(0.1996-45.1635) | 1      |
| <b>DPB1*18:01</b> | 1  | 2.9412  | 1 | 7.1429  | 0.4028(0.0099-16.3102) | 1      |
| <b>DPB1*40:01</b> | 1  | 2.9412  | 0 | 0.0000  | Inf(0.0217-Inf)        | 1      |
| <b>DPB1*85:01</b> | 2  | 5.8824  | 0 | 0.0000  | Inf(0.1174-Inf)        | 0.578  |
| <b>DQA1*01:01</b> | 4  | 12.5000 | 3 | 21.4286 | 0.5318(0.0991-3.1105)  | 0.6576 |
| <b>DQA1*01:02</b> | 15 | 46.8750 | 4 | 28.5714 | 2.169(0.5148-8.9474)   | 0.3352 |
| <b>DQA1*02:01</b> | 0  | 0.0000  | 1 | 7.1429  | 0(0-8.3125)            | 0.3043 |
| <b>DQA1*03:01</b> | 2  | 6.2500  | 1 | 7.1429  | 0.8694(0.063-27.0148)  | 1      |
| <b>DQA1*04:01</b> | 0  | 0.0000  | 1 | 7.1429  | 0(0-8.3125)            | 0.3043 |
| <b>DQA1*05:01</b> | 11 | 34.3750 | 4 | 28.5714 | 1.302(0.3281-5.4555)   | 0.7476 |
| <b>DQB1*02:01</b> | 5  | 13.8889 | 3 | 13.8889 | DQB1*02:01(5-13.8889)  | 0.3939 |
| <b>DQB1*02:02</b> | 0  | 0.0000  | 1 | 0.0000  | DQB1*02:02(0-0)        | 0.25   |
| <b>DQB1*03:01</b> | 4  | 11.1111 | 1 | 11.1111 | DQB1*03:01(4-11.1111)  | 1      |
| <b>DQB1*03:02</b> | 1  | 2.7778  | 0 | 2.7778  | DQB1*03:02(1-2.7778)   | 1      |
| <b>DQB1*03:03</b> | 1  | 2.7778  | 0 | 2.7778  | DQB1*03:03(1-2.7778)   | 1      |
| <b>DQB1*03:19</b> | 3  | 8.3333  | 0 | 8.3333  | DQB1*03:19(3-8.3333)   | 0.5629 |
| <b>DQB1*04:02</b> | 0  | 0.0000  | 1 | 0.0000  | DQB1*04:02(0-0)        | 0.25   |

|                   |    |         |   |         |                        |        |
|-------------------|----|---------|---|---------|------------------------|--------|
| <b>DQB1*05:01</b> | 7  | 19.4444 | 4 | 19.4444 | DQB1*05:01(7-19.4444)  | 0.4304 |
| <b>DQB1*06:02</b> | 13 | 36.1111 | 2 | 36.1111 | DQB1*06:02(13-36.1111) | 0.2919 |
| <b>DQB1*06:03</b> | 1  | 2.7778  | 0 | 2.7778  | DQB1*06:03(1-2.7778)   | 1      |
| <b>DQB1*06:09</b> | 1  | 2.7778  | 0 | 2.7778  | DQB1*06:09(1-2.7778)   | 1      |
| <b>DRB1*01:01</b> | 1  | 2.9412  | 1 | 8.3333  | 0.343(0.0084-13.9781)  | 0.458  |
| <b>DRB1*01:02</b> | 1  | 2.9412  | 0 | 0.0000  | Inf(0.0186-Inf)        | 1      |
| <b>DRB1*03:01</b> | 4  | 11.7647 | 3 | 25.0000 | 0.4093(0.0745-2.4367)  | 0.3554 |
| <b>DRB1*03:02</b> | 0  | 0.0000  | 1 | 8.3333  | 0(0-6.7059)            | 0.2609 |
| <b>DRB1*04:03</b> | 0  | 0.0000  | 1 | 8.3333  | 0(0-6.7059)            | 0.2609 |
| <b>DRB1*08:06</b> | 1  | 2.9412  | 0 | 0.0000  | Inf(0.0186-Inf)        | 1      |
| <b>DRB1*10:01</b> | 1  | 2.9412  | 0 | 0.0000  | Inf(0.0186-Inf)        | 1      |
| <b>DRB1*11:01</b> | 3  | 8.8235  | 3 | 25.0000 | 0.2999(0.0463-1.9261)  | 0.3167 |
| <b>DRB1*11:02</b> | 1  | 2.9412  | 0 | 0.0000  | Inf(0.0186-Inf)        | 1      |
| <b>DRB1*12:01</b> | 0  | 0.0000  | 1 | 8.3333  | 0(0-6.7059)            | 0.2609 |
| <b>DRB1*13:01</b> | 6  | 17.6471 | 0 | 0.0000  | Inf(0.464-Inf)         | 0.1762 |
| <b>DRB1*13:02</b> | 1  | 2.9412  | 0 | 0.0000  | Inf(0.0186-Inf)        | 1      |
| <b>DRB1*13:03</b> | 1  | 2.9412  | 0 | 0.0000  | Inf(0.0186-Inf)        | 1      |
| <b>DRB1*13:04</b> | 5  | 14.7059 | 0 | 0.0000  | Inf(0.3836-Inf)        | 0.3059 |
| <b>DRB1*14:01</b> | 1  | 2.9412  | 0 | 0.0000  | Inf(0.0186-Inf)        | 1      |
| <b>DRB1*14:03</b> | 1  | 2.9412  | 0 | 0.0000  | Inf(0.0186-Inf)        | 1      |
| <b>DRB1*15:01</b> | 1  | 2.9412  | 0 | 0.0000  | Inf(0.0186-Inf)        | 1      |
| <b>DRB1*15:03</b> | 6  | 17.6471 | 1 | 8.3333  | 2.3201(0.2866-58.1266) | 0.6569 |
| <b>DRB1*16:01</b> | 0  | 0.0000  | 1 | 8.3333  | 0(0-6.7059)            | 0.2609 |

**Table S4 Summary of alleles genotyping in the white population: the number of alleles at the HLA-A, -B, -C, -DPA1, -DPB1, -DQA1, -DQB1, -DRB1 loci were 21, 30, 18, 4, 15, 7, 15 and 20, respectively.**

| Allele         | COVID-19 |               | Control group |               | Odds ratio (95% CI)     | P-value |
|----------------|----------|---------------|---------------|---------------|-------------------------|---------|
|                | N        | Frequency (%) | N             | Frequency (%) |                         |         |
| <b>A*01:01</b> | 4        | 11.7647       | 10            | 11.6279       | 1.0132(0.2745-3.4462)   | 1.0000  |
| <b>A*02:01</b> | 10       | 29.4118       | 23            | 26.7442       | 1.14(0.4528-2.8593)     | 0.8219  |
| <b>A*02:05</b> | 0        | 0.0000        | 1             | 1.1628        | 0(0-48.0588)            | 1.0000  |
| <b>A*02:06</b> | 0        | 0.0000        | 1             | 1.1628        | 0(0-48.0588)            | 1.0000  |
| <b>A*03:01</b> | 6        | 17.6471       | 10            | 11.6279       | 1.6215(0.4988-4.9959)   | 0.3845  |
| <b>A*11:01</b> | 1        | 2.9412        | 9             | 10.4651       | 0.2614(0.0117-1.7219)   | 0.2787  |
| <b>A*23:01</b> | 1        | 2.9412        | 0             | 0.0000        | Inf(0.1331-Inf)         | 0.2833  |
| <b>A*24:02</b> | 5        | 14.7059       | 7             | 8.1395        | 1.934(0.5567-6.6538)    | 0.3172  |
| <b>A*25:01</b> | 0        | 0.0000        | 3             | 3.4884        | 0(0-4.3482)             | 0.5575  |
| <b>A*26:01</b> | 1        | 2.9412        | 4             | 4.6512        | 0.6234(0.0249-4.9971)   | 1.0000  |
| <b>A*26:08</b> | 0        | 0.0000        | 1             | 1.1628        | 0(0-48.0588)            | 1.0000  |
| <b>A*29:01</b> | 0        | 0.0000        | 1             | 1.1628        | 0(0-48.0588)            | 1.0000  |
| <b>A*29:02</b> | 1        | 2.9412        | 4             | 4.6512        | 0.6234(0.0249-4.9971)   | 1.0000  |
| <b>A*30:01</b> | 0        | 0.0000        | 1             | 1.1628        | 0(0-48.0588)            | 1.0000  |
| <b>A*30:02</b> | 0        | 0.0000        | 1             | 1.1628        | 0(0-48.0588)            | 1.0000  |
| <b>A*31:01</b> | 2        | 5.8824        | 4             | 4.6512        | 1.2785(0.1643-7.2204)   | 1.0000  |
| <b>A*32:01</b> | 1        | 2.9412        | 0             | 0.0000        | Inf(0.1331-Inf)         | 0.2833  |
| <b>A*33:01</b> | 0        | 0.0000        | 1             | 1.1628        | 0(0-48.0588)            | 1.0000  |
| <b>A*33:03</b> | 0        | 0.0000        | 1             | 1.1628        | 0(0-48.0588)            | 1.0000  |
| <b>A*68:01</b> | 2        | 5.8824        | 3             | 3.4884        | 1.7205(0.2052-11.5549)  | 0.6211  |
| <b>A*74:01</b> | 0        | 0.0000        | 1             | 1.1628        | 0(0-48.0588)            | 1.0000  |
| <b>B*07:02</b> | 3        | 10.0000       | 6             | 8.5714        | 1.1831(0.2401-5.94)     | 1.0000  |
| <b>B*07:05</b> | 0        | 0.0000        | 1             | 1.4286        | 0(0-44.3333)            | 1.0000  |
| <b>B*08:01</b> | 2        | 6.6667        | 7             | 10.0000       | 0.6455(0.0914-3.3204)   | 0.7202  |
| <b>B*13:02</b> | 1        | 3.3333        | 2             | 2.8571        | 1.1705(0.0391-15.4767)  | 1.0000  |
| <b>B*14:01</b> | 0        | 0.0000        | 3             | 4.2857        | 0(0-4.0063)             | 0.5519  |
| <b>B*14:02</b> | 1        | 3.3333        | 3             | 4.2857        | 0.7721(0.0288-7.3114)   | 1.0000  |
| <b>B*15:01</b> | 2        | 6.6667        | 5             | 7.1429        | 0.9293(0.1243-4.9592)   | 1.0000  |
| <b>B*15:10</b> | 0        | 0.0000        | 1             | 1.4286        | 0(0-44.3333)            | 1.0000  |
| <b>B*18:01</b> | 1        | 3.3333        | 2             | 2.8571        | 1.1705(0.0391-15.4767)  | 1.0000  |
| <b>B*27:05</b> | 1        | 3.3333        | 6             | 8.5714        | 0.3708(0.0157-2.7455)   | 0.4386  |
| <b>B*35:01</b> | 1        | 3.3333        | 3             | 4.2857        | 0.7721(0.0288-7.3114)   | 1.0000  |
| <b>B*35:02</b> | 1        | 3.3333        | 0             | 0.0000        | Inf(0.1228-Inf)         | 0.3000  |
| <b>B*35:03</b> | 1        | 3.3333        | 2             | 2.8571        | 1.1705(0.0391-15.4767)  | 1.0000  |
| <b>B*37:01</b> | 0        | 0.0000        | 1             | 1.4286        | 0(0-44.3333)            | 1.0000  |
| <b>B*39:01</b> | 2        | 6.6667        | 1             | 1.4286        | 4.8392(0.3659-144.8529) | 0.2134  |
| <b>B*40:01</b> | 1        | 3.3333        | 4             | 5.7143        | 0.5718(0.0227-4.6168)   | 1.0000  |
| <b>B*40:02</b> | 0        | 0.0000        | 1             | 1.4286        | 0(0-44.3333)            | 1.0000  |
| <b>B*40:06</b> | 0        | 0.0000        | 1             | 1.4286        | 0(0-44.3333)            | 1.0000  |

|                   |    |         |    |         |                        |        |
|-------------------|----|---------|----|---------|------------------------|--------|
| <b>B*41:01</b>    | 0  | 0.0000  | 2  | 2.8571  | 0(0-8.1365)            | 0.5758 |
| <b>B*44:02</b>    | 4  | 13.3333 | 6  | 8.5714  | 1.6323(0.4011-7.2459)  | 0.4816 |
| <b>B*44:03</b>    | 3  | 10.0000 | 3  | 4.2857  | 2.4562(0.4197-14.3849) | 0.3608 |
| <b>B*45:01</b>    | 0  | 0.0000  | 2  | 2.8571  | 0(0-8.1365)            | 0.5758 |
| <b>B*49:01</b>    | 1  | 3.3333  | 0  | 0.0000  | Inf(0.1228-Inf)        | 0.3000 |
| <b>B*50:01</b>    | 2  | 6.6667  | 0  | 0.0000  | Inf(0.6823-Inf)        | 0.0879 |
| <b>B*51:01</b>    | 0  | 0.0000  | 2  | 2.8571  | 0(0-8.1365)            | 0.5758 |
| <b>B*52:01</b>    | 0  | 0.0000  | 1  | 1.4286  | 0(0-44.3333)           | 1.0000 |
| <b>B*55:01</b>    | 0  | 0.0000  | 2  | 2.8571  | 0(0-8.1365)            | 0.5758 |
| <b>B*56:01</b>    | 0  | 0.0000  | 1  | 1.4286  | 0(0-44.3333)           | 1.0000 |
| <b>B*57:01</b>    | 2  | 6.6667  | 2  | 2.8571  | 2.4044(0.2493-23.1959) | 0.5812 |
| <b>B*57:02</b>    | 1  | 3.3333  | 0  | 0.0000  | Inf(0.1228-Inf)        | 0.3000 |
| <b>C*01:02</b>    | 3  | 8.8235  | 3  | 3.7500  | 2.4616(0.4237-14.3103) | 0.3608 |
| <b>C*02:02</b>    | 0  | 0.0000  | 6  | 7.5000  | 0(0-1.6512)            | 0.1765 |
| <b>C*03:03</b>    | 0  | 0.0000  | 4  | 5.0000  | 0(0-2.6108)            | 0.3157 |
| <b>C*03:04</b>    | 2  | 5.8824  | 9  | 11.2500 | 0.4957(0.0731-2.5922)  | 0.5015 |
| <b>C*04:01</b>    | 5  | 14.7059 | 6  | 7.5000  | 2.1109(0.5878-8.4442)  | 0.2993 |
| <b>C*05:01</b>    | 5  | 14.7059 | 8  | 10.0000 | 1.5454(0.4551-5.7532)  | 0.5245 |
| <b>C*06:02</b>    | 5  | 14.7059 | 9  | 11.2500 | 1.3564(0.4073-4.5498)  | 0.7558 |
| <b>C*07:01</b>    | 4  | 11.7647 | 9  | 11.2500 | 1.0514(0.2802-3.8546)  | 1.0000 |
| <b>C*07:02</b>    | 6  | 17.6471 | 9  | 11.2500 | 1.6821(0.5035-5.2972)  | 0.3741 |
| <b>C*07:04</b>    | 0  | 0.0000  | 1  | 1.2500  | 0(0-44.7059)           | 1.0000 |
| <b>C*08:02</b>    | 1  | 2.9412  | 6  | 7.5000  | 0.3764(0.016-2.7808)   | 0.4422 |
| <b>C*12:02</b>    | 0  | 0.0000  | 1  | 1.2500  | 0(0-44.7059)           | 1.0000 |
| <b>C*12:03</b>    | 0  | 0.0000  | 1  | 1.2500  | 0(0-44.7059)           | 1.0000 |
| <b>C*15:02</b>    | 0  | 0.0000  | 1  | 1.2500  | 0(0-44.7059)           | 1.0000 |
| <b>C*16:01</b>    | 2  | 5.8824  | 4  | 5.0000  | 1.1856(0.1522-6.7034)  | 1.0000 |
| <b>C*16:02</b>    | 0  | 0.0000  | 1  | 1.2500  | 0(0-44.7059)           | 1.0000 |
| <b>C*17:01</b>    | 0  | 0.0000  | 1  | 1.2500  | 0(0-44.7059)           | 1.0000 |
| <b>C*18:01</b>    | 1  | 2.9412  | 1  | 1.2500  | 2.3734(0.0604-93.2687) | 1.0000 |
| <b>DPA1*01:03</b> | 27 | 79.4118 | 66 | 76.7442 | 1.1673(0.4349-3.6294)  | 0.8133 |
| <b>DPA1*01:04</b> | 0  | 0.0000  | 1  | 1.1628  | 0(0-48.0588)           | 1.0000 |
| <b>DPA1*02:01</b> | 4  | 11.7647 | 13 | 15.1163 | 0.7504(0.2099-2.5997)  | 0.7760 |
| <b>DPA1*02:02</b> | 3  | 8.8235  | 6  | 6.9767  | 1.2875(0.2638-6.3185)  | 0.7117 |
| <b>DPB1*01:01</b> | 1  | 3.5714  | 2  | 2.5641  | 1.4025(0.0468-18.5584) | 1.0000 |
| <b>DPB1*02:01</b> | 3  | 10.7143 | 6  | 7.6923  | 1.4347(0.2908-7.2372)  | 0.6959 |
| <b>DPB1*03:01</b> | 3  | 10.7143 | 6  | 7.6923  | 1.4347(0.2908-7.2372)  | 0.6959 |
| <b>DPB1*04:01</b> | 11 | 39.2857 | 38 | 48.7179 | 0.6836(0.2792-1.6474)  | 0.5081 |
| <b>DPB1*04:02</b> | 5  | 17.8571 | 6  | 7.6923  | 2.5813(0.7093-10.6349) | 0.1544 |
| <b>DPB1*05:01</b> | 2  | 7.1429  | 3  | 3.8462  | 1.9098(0.226-12.9377)  | 0.6059 |
| <b>DPB1*06:01</b> | 2  | 7.1429  | 3  | 3.8462  | 1.9098(0.226-12.9377)  | 0.6059 |
| <b>DPB1*09:01</b> | 0  | 0.0000  | 1  | 1.2821  | 0(0-52.9286)           | 1.0000 |
| <b>DPB1*10:01</b> | 0  | 0.0000  | 3  | 3.8462  | 0(0-4.8004)            | 0.5642 |

|                   |   |         |    |         |                         |        |
|-------------------|---|---------|----|---------|-------------------------|--------|
| <b>DPB1*11:01</b> | 1 | 3.5714  | 4  | 5.1282  | 0.6874(0.0273-5.5561)   | 1.0000 |
| <b>DPB1*14:01</b> | 0 | 0.0000  | 1  | 1.2821  | 0(0-52.9286)            | 1.0000 |
| <b>DPB1*15:01</b> | 0 | 0.0000  | 1  | 1.2821  | 0(0-52.9286)            | 1.0000 |
| <b>DPB1*16:01</b> | 0 | 0.0000  | 1  | 1.2821  | 0(0-52.9286)            | 1.0000 |
| <b>DPB1*17:01</b> | 0 | 0.0000  | 1  | 1.2821  | 0(0-52.9286)            | 1.0000 |
| <b>DPB1*19:01</b> | 0 | 0.0000  | 2  | 2.5641  | 0(0-9.7321)             | 1.0000 |
| <b>DQA1*01:01</b> | 4 | 12.5000 | 13 | 16.2500 | 0.7382(0.2053-2.5962)   | 0.7742 |
| <b>DQA1*01:02</b> | 6 | 18.7500 | 13 | 16.2500 | 1.1874(0.3806-3.5601)   | 0.7836 |
| <b>DQA1*01:03</b> | 2 | 6.2500  | 10 | 12.5000 | 0.4694(0.0699-2.3032)   | 0.5036 |
| <b>DQA1*02:01</b> | 5 | 15.6250 | 16 | 20.0000 | 0.7427(0.2384-2.1879)   | 0.7896 |
| <b>DQA1*03:01</b> | 7 | 21.8750 | 16 | 20.0000 | 1.1188(0.359-3.314)     | 1.0000 |
| <b>DQA1*04:01</b> | 2 | 6.2500  | 1  | 1.2500  | 5.1757(0.3925-154.52)   | 0.1959 |
| <b>DQA1*05:01</b> | 6 | 18.7500 | 11 | 13.7500 | 1.4425(0.448-4.7541)    | 0.5634 |
| <b>DQB1*02:01</b> | 4 | 12.5000 | 7  | 8.5366  | 1.5245(0.3887-5.5554)   | 0.7253 |
| <b>DQB1*02:02</b> | 4 | 12.5000 | 9  | 10.9756 | 1.1572(0.3075-4.276)    | 1.0000 |
| <b>DQB1*03:01</b> | 3 | 9.3750  | 12 | 14.6341 | 0.6059(0.1367-2.2411)   | 0.5517 |
| <b>DQB1*03:02</b> | 5 | 15.6250 | 12 | 14.6341 | 1.0795(0.3363-3.5993)   | 1.0000 |
| <b>DQB1*03:03</b> | 2 | 6.2500  | 4  | 4.8780  | 1.2969(0.1662-7.3473)   | 1.0000 |
| <b>DQB1*04:02</b> | 2 | 6.2500  | 1  | 1.2195  | 5.3062(0.4025-158.3838) | 0.1898 |
| <b>DQB1*05:01</b> | 2 | 6.2500  | 11 | 13.4146 | 0.433(0.0651-2.0132)    | 0.3463 |
| <b>DQB1*05:02</b> | 1 | 3.1250  | 1  | 1.2195  | 2.5876(0.0658-101.7662) | 0.4844 |
| <b>DQB1*05:03</b> | 2 | 6.2500  | 4  | 4.8780  | 1.2969(0.1662-7.3473)   | 1.0000 |
| <b>DQB1*05:04</b> | 1 | 3.1250  | 0  | 0.0000  | Inf(0.1349-Inf)         | 0.2807 |
| <b>DQB1*06:01</b> | 1 | 3.1250  | 1  | 1.2195  | 2.5876(0.0658-101.7662) | 0.4844 |
| <b>DQB1*06:02</b> | 2 | 6.2500  | 9  | 10.9756 | 0.5433(0.0799-2.7463)   | 0.5128 |
| <b>DQB1*06:03</b> | 2 | 6.2500  | 8  | 9.7561  | 0.619(0.0898-2.8862)    | 0.7229 |
| <b>DQB1*06:04</b> | 0 | 0.0000  | 2  | 2.4390  | 0(0-8.9399)             | 1.0000 |
| <b>DQB1*06:09</b> | 1 | 3.1250  | 1  | 1.2195  | 2.5876(0.0658-101.7662) | 0.4844 |
| <b>DRB1*01:01</b> | 2 | 6.6667  | 8  | 11.1111 | 0.5743(0.0829-2.6834)   | 0.7192 |
| <b>DRB1*03:01</b> | 4 | 13.3333 | 5  | 6.9444  | 2.0454(0.4832-8.2186)   | 0.4433 |
| <b>DRB1*04:01</b> | 4 | 13.3333 | 8  | 11.1111 | 1.2282(0.3183-4.823)    | 0.7442 |
| <b>DRB1*04:02</b> | 1 | 3.3333  | 0  | 0.0000  | Inf(0.1263-Inf)         | 0.2941 |
| <b>DRB1*04:04</b> | 1 | 3.3333  | 4  | 5.5556  | 0.589(0.0234-4.753)     | 1.0000 |
| <b>DRB1*07:01</b> | 4 | 13.3333 | 14 | 19.4444 | 0.64(0.1781-2.2209)     | 0.5757 |
| <b>DRB1*08:01</b> | 2 | 6.6667  | 1  | 1.3889  | 4.9787(0.3766-148.9925) | 0.2061 |
| <b>DRB1*09:01</b> | 1 | 3.3333  | 1  | 1.3889  | 2.424(0.0615-95.5137)   | 1.0000 |
| <b>DRB1*10:01</b> | 1 | 3.3333  | 2  | 2.7778  | 1.2046(0.0403-15.923)   | 1.0000 |
| <b>DRB1*11:01</b> | 1 | 3.3333  | 5  | 6.9444  | 0.465(0.0192-3.7846)    | 0.6677 |
| <b>DRB1*11:02</b> | 0 | 0.0000  | 1  | 1.3889  | 0(0-45.6)               | 1.0000 |

|                   |   |         |   |        |                         |        |
|-------------------|---|---------|---|--------|-------------------------|--------|
| <b>DRB1*11:04</b> | 2 | 6.6667  | 1 | 1.3889 | 4.9787(0.3766-148.9925) | 0.2061 |
| <b>DRB1*12:01</b> | 0 | 0.0000  | 1 | 1.3889 | 0(0-45.6)               | 1.0000 |
| <b>DRB1*13:01</b> | 2 | 6.6667  | 7 | 9.7222 | 0.6657(0.0943-3.4203)   | 0.7231 |
| <b>DRB1*13:02</b> | 1 | 3.3333  | 3 | 4.1667 | 0.7948(0.0297-7.5246)   | 1.0000 |
| <b>DRB1*14:01</b> | 0 | 0.0000  | 2 | 2.7778 | 0(0-8.3711)             | 0.5807 |
| <b>DRB1*15:01</b> | 3 | 10.0000 | 7 | 9.7222 | 1.0314(0.2153-4.3008)   | 1.0000 |
| <b>DRB1*15:02</b> | 0 | 0.0000  | 1 | 1.3889 | 0(0-45.6)               | 1.0000 |
| <b>DRB1*15:03</b> | 0 | 0.0000  | 1 | 1.3889 | 0(0-45.6)               | 1.0000 |
| <b>DRB1*16:01</b> | 1 | 3.3333  | 0 | 0.0000 | Inf(0.1263-Inf)         | 0.2941 |
